# Supplementary material
Source: MDPI journal article supplement (https://www.mdpi.com/2076-3417/14/6/2446)
Supplement: s1 [file s1]

### Supplementary Material. Tables of results

**Table S1.** Fuel mass injected per stroke (mg/st) in every experimental tested.

| P <sub>inj</sub> (bar) | Average fuel mass injection per stroke (mg/st) |      |      |        |       |       |        |       |       | ET (ms) | Tf (°C) |    |    |
|------------------------|------------------------------------------------|------|------|--------|-------|-------|--------|-------|-------|---------|---------|----|----|
|                        | 115μm                                          |      |      | 130μm  |       |       | 150μm  |       |       |         |         |    |    |
|                        | Diesel                                         | HVO  | GtL  | Diesel | HVO   | GtL   | Diesel | HVO   | GtL   |         |         |    |    |
| 500                    | 3.63                                           | 3.70 | 3.50 | 4.16   | 3.90  | 4.13  | 5.33   | 4.83  | 5.20  | 1.0     | 20      |    |    |
| 700                    | 4.46                                           | 4.23 | 4.16 | 5.23   | 4.93  | 5.02  | 6.43   | 6.33  | 6.33  |         |         |    |    |
| 900                    | 4.93                                           | 4.83 | 4.73 | 5.86   | 5.63  | 5.70  | 7.13   | 6.69  | 6.93  |         |         |    |    |
| 1100                   | 5.53                                           | 5.23 | 5.13 | 6.43   | 6.00  | 6.23  | 7.89   | 7.86  | 7.63  |         |         |    |    |
| 500                    | 4.83                                           | 4.73 | 4.66 | 5.66   | 5.43  | 5.46  | 7.10   | 7.13  | 6.95  | 1.5     |         | 20 |    |
| 700                    | 5.86                                           | 5.56 | 5.55 | 6.93   | 6.83  | 6.56  | 8.49   | 8.39  | 8.39  |         |         |    |    |
| 900                    | 6.73                                           | 6.50 | 6.36 | 7.93   | 7.50  | 7.46  | 9.76   | 9.46  | 9.46  |         |         |    |    |
| 1100                   | 7.27                                           | 7.13 | 7.13 | 8.73   | 8.39  | 8.29  | 10.83  | 10.69 | 10.36 |         |         |    |    |
| 500                    | 6.1                                            | 5.83 | 6.00 | 7.20   | 7.00  | 6.90  | 8.89   | 8.69  | 8.76  | 2.0     |         |    | 20 |
| 700                    | 7.26                                           | 7.05 | 7.09 | 8.69   | 8.29  | 8.43  | 10.73  | 10.66 | 10.49 |         |         |    |    |
| 900                    | 8.33                                           | 8.06 | 8.06 | 9.99   | 9.56  | 9.53  | 12.46  | 12.06 | 11.96 |         |         |    |    |
| 1100                   | 9.36                                           | 9.03 | 8.79 | 10.93  | 10.56 | 10.66 | 13.66  | 13.39 | 13.06 |         |         |    |    |
| 500                    | 3.46                                           | 3.60 | 3.56 | 4.23   | 4.06  | 4.13  | 5.06   | 5.13  | 5.13  | 1.0     | 40      |    |    |
| 700                    | 4.40                                           | 4.30 | 4.33 | 5.33   | 4.86  | 4.93  | 6.26   | 6.16  | 6.06  |         |         |    |    |
| 900                    | 4.90                                           | 4.93 | 4.73 | 5.86   | 5.46  | 5.66  | 7.06   | 6.93  | 6.83  |         |         |    |    |
| 1100                   | 5.50                                           | 5.26 | 5.23 | 6.46   | 5.96  | 6.20  | 7.69   | 7.59  | 7.49  |         |         |    |    |
| 500                    | 4.86                                           | 4.56 | 4.63 | 5.93   | 5.40  | 5.63  | 7.00   | 6.76  | 6.90  | 1.5     |         | 40 |    |
| 700                    | 5.90                                           | 5.63 | 5.63 | 6.90   | 6.63  | 6.66  | 8.53   | 8.36  | 8.19  |         |         |    |    |
| 900                    | 6.63                                           | 6.46 | 6.53 | 7.96   | 7.43  | 7.56  | 9.69   | 9.46  | 9.33  |         |         |    |    |
| 1100                   | 7.39                                           | 7.03 | 7.06 | 8.76   | 8.26  | 8.43  | 10.83  | 10.49 | 10.35 |         |         |    |    |
| 500                    | 6.10                                           | 5.93 | 5.93 | 7.20   | 6.80  | 6.93  | 8.83   | 8.69  | 8.59  | 2.0     |         |    | 40 |
| 700                    | 7.36                                           | 7.23 | 7.00 | 8.86   | 8.26  | 8.33  | 10.69  | 10.46 | 10.36 |         |         |    |    |
| 900                    | 8.36                                           | 8.06 | 8.13 | 10.03  | 9.62  | 9.49  | 12.33  | 12.06 | 11.82 |         |         |    |    |
| 1100                   | 9.33                                           | 8.86 | 8.69 | 10.96  | 10.63 | 10.69 | 13.52  | 13.39 | 13.12 |         |         |    |    |

**Table S2.** Time values for each phase for nozzle with 115  $\mu\text{m}$ 

| P <sub>inj</sub><br>(bar) | Time value (s) |           |           |                   |           |           |                |           |           | ET<br>(ms) | T <sub>f</sub><br>(°C) |
|---------------------------|----------------|-----------|-----------|-------------------|-----------|-----------|----------------|-----------|-----------|------------|------------------------|
|                           | Needle lift    |           |           | Holding injection |           |           | Needle closure |           |           |            |                        |
|                           | Diesel         | HVO       | GtL       | Diesel            | HVO       | GtL       | Diesel         | HVO       | GtL       |            |                        |
| 500                       | 0.21-0.63      | 0.19-0.63 | 0.19-0.63 | 0.63-1.88         | 0.63-1.88 | 0.63-1.88 | 1.88-2.16      | 1.88-2.19 | 1.88-2.19 | 1.0        | 20                     |
| 700                       | 0.17-0.52      | 0.18-0.50 | 0.17-0.51 | 0.52-1.89         | 0.50-1.88 | 0.51-1.87 | 1.89-2.33      | 1.88-2.33 | 1.87-2.33 |            |                        |
| 900                       | 0.16-0.48      | 0.16-0.47 | 0.14-0.47 | 0.48-1.87         | 0.47-1.84 | 0.47-1.83 | 1.87-2.32      | 1.84-2.32 | 1.83-2.32 |            |                        |
| 1100                      | 0.15-0.47      | 0.16-0.46 | 0.16-0.46 | 0.47-1.83         | 0.46-1.82 | 0.46-1.80 | 1.83-2.32      | 1.82-2.32 | 1.80-2.32 |            |                        |
| 500                       | 0.19-0.57      | 0.18-0.57 | 0.18-0.57 | 0.57-2.46         | 0.57-2.39 | 0.57-2.39 | 2.46-2.78      | 2.39-2.73 | 2.39-2.73 | 1.5        |                        |
| 700                       | 0.17-0.52      | 0.17-0.49 | 0.16-0.50 | 0.52-2.39         | 0.49-2.38 | 0.50-2.35 | 2.39-2.70      | 2.38-2.76 | 2.35-2.77 |            |                        |
| 900                       | 0.15-0.48      | 0.17-0.45 | 0.14-0.46 | 0.48-2.38         | 0.45-2.37 | 0.46-2.35 | 2.38-2.78      | 2.37-2.77 | 2.35-2.78 |            |                        |
| 1100                      | 0.15-0.46      | 0.15-0.46 | 0.15-0.46 | 0.46-2.35         | 0.46-2.34 | 0.46-2.33 | 2.35-2.75      | 2.34-2.75 | 2.33-2.75 |            |                        |
| 500                       | 0.20-0.58      | 0.20-0.58 | 0.20-0.58 | 0.58-2.94         | 0.58-2.91 | 0.58-2.94 | 2.94-3.28      | 2.91-3.28 | 2.94-3.28 | 2.0        |                        |
| 700                       | 0.18-0.52      | 0.17-0.50 | 0.17-0.50 | 0.52-2.89         | 0.50-2.89 | 0.50-2.86 | 2.89-3.31      | 2.89-3.31 | 2.86-3.31 |            |                        |
| 900                       | 0.16-0.47      | 0.15-0.45 | 0.14-0.46 | 0.47-2.86         | 0.45-2.84 | 0.46-2.85 | 2.86-3.28      | 2.84-3.28 | 2.85-3.27 |            |                        |
| 1100                      | 0.15-0.45      | 0.12-0.45 | 0.16-0.47 | 0.45-2.86         | 0.45-2.85 | 0.47-2.84 | 2.86-3.33      | 2.85-3.32 | 2.84-3.32 |            |                        |
| 500                       | 0.18-0.63      | 0.18-0.64 | 0.19-0.64 | 0.63-1.89         | 0.64-1.88 | 0.64-1.88 | 1.89-2.19      | 1.88-2.18 | 1.88-2.16 | 1.0        | 40                     |
| 700                       | 0.17-0.53      | 0.15-0.49 | 0.15-0.51 | 0.53-1.91         | 0.49-1.88 | 0.51-1.85 | 1.91-2.32      | 1.88-2.33 | 1.85-2.30 |            |                        |
| 900                       | 0.16-0.50      | 0.16-0.45 | 0.16-0.45 | 0.50-1.85         | 0.45-1.82 | 0.45-1.81 | 1.85-2.32      | 1.82-2.31 | 1.81-2.30 |            |                        |
| 1100                      | 0.17-0.48      | 0.14-0.46 | 0.12-0.46 | 0.48-1.83         | 0.46-1.82 | 0.46-1.80 | 1.83-2.32      | 1.82-2.32 | 1.80-2.30 |            |                        |
| 500                       | 0.19-0.57      | 0.18-0.59 | 0.18-0.58 | 0.57-2.46         | 0.59-2.39 | 0.58-2.40 | 2.46-2.78      | 2.39-2.73 | 2.40-2.72 | 1.5        |                        |
| 700                       | 0.15-0.52      | 0.17-0.50 | 0.17-0.49 | 0.52-2.40         | 0.50-2.38 | 0.49-2.37 | 2.40-2.77      | 2.38-2.76 | 2.37-2.77 |            |                        |
| 900                       | 0.17-0.49      | 0.16-0.47 | 0.14-0.45 | 0.49-2.36         | 0.47-2.38 | 0.45-2.34 | 2.36-2.78      | 2.38-2.77 | 2.34-2.76 |            |                        |
| 1100                      | 0.16-0.47      | 0.13-0.46 | 0.16-0.47 | 0.47-2.35         | 0.46-2.35 | 0.47-2.35 | 2.35-2.75      | 2.35-2.75 | 2.35-2.74 |            |                        |
| 500                       | 0.19-0.58      | 0.18-0.59 | 0.20-0.58 | 0.58-2.94         | 0.59-2.91 | 0.58-2.91 | 2.94-3.28      | 2.91-3.27 | 2.91-3.26 | 2.0        |                        |
| 700                       | 0.19-0.53      | 0.15-0.49 | 0.14-0.49 | 0.53-2.93         | 0.49-2.89 | 0.49-2.89 | 2.93-3.31      | 2.89-3.30 | 2.89-3.29 |            |                        |
| 900                       | 0.16-0.48      | 0.16-0.45 | 0.14-0.46 | 0.48-2.86         | 0.45-2.86 | 0.46-2.84 | 2.86-3.28      | 2.86-3.27 | 2.84-3.26 |            |                        |
| 1100                      | 0.16-0.48      | 0.14-0.46 | 0.15-0.45 | 0.48-2.86         | 0.46-2.86 | 0.45-2.85 | 2.86-3.33      | 2.86-3.32 | 2.85-3.30 |            |                        |

**Table S3.** Time values for each phase for nozzle with 130 µm

| Pinj<br>(bar) | Time value (s) |           |           |                   |           |           |                |           |           | ET<br>(ms) | Tf<br>(°C) |
|---------------|----------------|-----------|-----------|-------------------|-----------|-----------|----------------|-----------|-----------|------------|------------|
|               | Needle lift    |           |           | Holding injection |           |           | Needle closure |           |           |            |            |
|               | Diesel         | HVO       | GtL       | Diesel            | HVO       | GtL       | Diesel         | HVO       | GtL       |            |            |
| 500           | 0.18-0.65      | 0.17-0.67 | 0.17-0.59 | 0.65-1.87         | 0.67-1.82 | 0.59-1.88 | 1.87-2.19      | 1.82-2.19 | 1.88-2.16 | 1.0        | 20         |
| 700           | 0.16-0.55      | 0.18-0.54 | 0.16-0.58 | 0.55-1.81         | 0.54-1.82 | 0.58-1.83 | 1.81-2.31      | 1.82-2.32 | 1.83-2.31 |            |            |
| 900           | 0.15-0.49      | 0.18-0.49 | 0.16-0.48 | 0.49-1.80         | 0.49-1.75 | 0.48-1.74 | 1.80-2.32      | 1.72-2.32 | 1.74-2.32 |            |            |
| 1100          | 0.14-0.49      | 0.15-0.49 | 0.16-0.47 | 0.49-1.77         | 0.49-1.78 | 0.47-1.78 | 1.77-2.32      | 1.78-2.30 | 1.78-2.32 |            |            |
| 500           | 0.19-0.61      | 0.18-0.69 | 0.19-0.60 | 0.61-2.39         | 0.69-2.37 | 0.60-2.37 | 2.39-2.73      | 2.37-2.73 | 2.37-2.73 | 1.5        |            |
| 700           | 0.17-0.59      | 0.16-0.56 | 0.17-0.58 | 0.59-2.34         | 0.56-2.32 | 0.58-2.32 | 2.34-2.75      | 2.32-2.76 | 2.32-2.73 |            |            |
| 900           | 0.16-0.53      | 0.16-0.51 | 0.16-0.49 | 0.53-2.32         | 0.51-2.31 | 0.49-2.33 | 2.32-2.75      | 2.31-2.73 | 2.33-2.72 |            |            |
| 1100          | 0.14-0.49      | 0.18-0.49 | 0.16-0.49 | 0.49-2.31         | 0.49-2.30 | 0.49-2.29 | 2.31-2.75      | 2.30-2.75 | 2.29-2.73 |            |            |
| 500           | 0.18-0.63      | 0.19-0.68 | 0.19-0.61 | 0.63-2.88         | 0.68-2.86 | 0.61-2.89 | 2.88-3.28      | 2.86-3.27 | 2.89-3.26 | 2.0        |            |
| 700           | 0.16-0.59      | 0.17-0.55 | 0.17-0.56 | 0.59-2.82         | 0.55-2.84 | 0.56-2.82 | 2.82-3.33      | 2.84-3.32 | 2.82-3.33 |            |            |
| 900           | 0.16-0.53      | 0.15-0.53 | 0.15-0.49 | 0.53-2.83         | 0.53-2.81 | 0.49-2.79 | 2.83-3.32      | 2.81-3.31 | 2.79-3.30 |            |            |
| 1100          | 0.16-0.49      | 0.15-0.48 | 0.14-0.47 | 0.49-2.81         | 0.48-2.80 | 0.47-2.80 | 2.81-3.32      | 2.80-3.30 | 2.80-3.32 |            |            |
| 500           | 0.17-0.64      | 0.20-0.63 | 0.19-0.62 | 0.64-1.87         | 0.63-1.86 | 0.62-1.87 | 1.87-2.19      | 1.86-2.19 | 1.87-2.16 | 1.0        | 40         |
| 700           | 0.16-0.55      | 0.17-0.56 | 0.18-0.52 | 0.55-1.80         | 0.56-1.83 | 0.52-1.83 | 1.80-2.31      | 1.83-2.31 | 1.83-2.31 |            |            |
| 900           | 0.15-0.50      | 0.15-0.49 | 0.16-0.50 | 0.50-1.76         | 0.49-1.80 | 0.50-1.79 | 1.76-2.32      | 1.80-2.32 | 1.79-2.31 |            |            |
| 1100          | 0.16-0.51      | 0.15-0.49 | 0.15-0.47 | 0.51-1.79         | 0.49-1.78 | 0.47-1.74 | 1.79-2.32      | 1.78-2.31 | 1.74-2.30 |            |            |
| 500           | 0.17-0.63      | 0.22-0.66 | 0.18-0.57 | 0.63-2.37         | 0.66-2.38 | 0.57-2.33 | 2.37-2.73      | 2.38-2.73 | 2.33-2.73 | 1.5        |            |
| 700           | 0.17-0.59      | 0.17-0.57 | 0.17-0.55 | 0.59-2.33         | 0.57-2.34 | 0.55-2.33 | 2.33-2.75      | 2.34-2.74 | 2.33-2.75 |            |            |
| 900           | 0.15-0.52      | 0.16-0.52 | 0.17-0.48 | 0.52-2.28         | 0.52-2.32 | 0.48-2.31 | 2.28-2.75      | 2.32-2.75 | 2.31-2.75 |            |            |
| 1100          | 0.14-0.49      | 0.15-0.51 | 0.14-0.47 | 0.49-2.31         | 0.51-2.32 | 0.47-2.28 | 2.31-2.75      | 2.32-2.72 | 2.28-2.74 |            |            |
| 500           | 0.17-0.64      | 0.22-0.65 | 0.19-0.61 | 0.64-2.87         | 0.65-2.88 | 0.61-2.87 | 2.87-3.28      | 2.88-3.28 | 2.87-3.26 | 2.0        |            |
| 700           | 0.16-0.60      | 0.15-0.61 | 0.17-0.56 | 0.60-2.82         | 0.61-2.82 | 0.56-2.83 | 2.82-3.33      | 2.82-3.30 | 2.83-3.32 |            |            |
| 900           | 0.15-0.53      | 0.17-0.51 | 0.15-0.49 | 0.53-2.82         | 0.51-2.83 | 0.49-2.80 | 2.86-3.32      | 2.83-3.32 | 2.80-3.26 |            |            |
| 1100          | 0.16-0.49      | 0.18-0.48 | 0.17-0.47 | 0.49-2.81         | 0.48-2.81 | 0.47-2.79 | 2.81-3.32      | 2.81-3.32 | 2.79-3.32 |            |            |

**Table S4.** Time values for each phase for nozzle with 150  $\mu\text{m}$ 

| P <sub>inj</sub><br>(bar) | Time value (s) |           |           |                   |           |           |                |           |           | ET<br>(ms) | T <sub>f</sub><br>(°C) |
|---------------------------|----------------|-----------|-----------|-------------------|-----------|-----------|----------------|-----------|-----------|------------|------------------------|
|                           | Needle lift    |           |           | Holding injection |           |           | Needle closure |           |           |            |                        |
|                           | Diesel         | HVO       | GtL       | Diesel            | HVO       | GtL       | Diesel         | HVO       | GtL       |            |                        |
| 500                       | 0.18-0.65      | 0.17-0.67 | 0.17-0.59 | 0.65-1.87         | 0.67-1.82 | 0.59-1.88 | 1.87-2.19      | 1.82-2.19 | 1.88-2.16 | 1.0        | 20                     |
| 700                       | 0.16-0.55      | 0.18-0.54 | 0.16-0.58 | 0.55-1.81         | 0.54-1.82 | 0.58-1.83 | 1.81-2.31      | 1.82-2.32 | 1.83-2.31 |            |                        |
| 900                       | 0.15-0.49      | 0.18-0.49 | 0.16-0.48 | 0.49-1.80         | 0.49-1.75 | 0.48-1.74 | 1.80-2.32      | 1.72-2.32 | 1.74-2.32 |            |                        |
| 1100                      | 0.14-0.49      | 0.15-0.49 | 0.16-0.47 | 0.49-1.77         | 0.49-1.78 | 0.47-1.78 | 1.77-2.32      | 1.78-2.30 | 1.78-2.32 |            |                        |
| 500                       | 0.19-0.61      | 0.18-0.69 | 0.19-0.60 | 0.61-2.39         | 0.69-2.37 | 0.60-2.37 | 2.39-2.73      | 2.37-2.73 | 2.37-2.73 | 1.5        |                        |
| 700                       | 0.17-0.59      | 0.16-0.56 | 0.17-0.58 | 0.59-2.34         | 0.56-2.32 | 0.58-2.32 | 2.34-2.75      | 2.32-2.76 | 2.32-2.73 |            |                        |
| 900                       | 0.16-0.53      | 0.16-0.51 | 0.16-0.49 | 0.53-2.32         | 0.51-2.31 | 0.49-2.33 | 2.32-2.75      | 2.31-2.73 | 2.33-2.72 |            |                        |
| 1100                      | 0.14-0.49      | 0.18-0.49 | 0.16-0.49 | 0.49-2.31         | 0.49-2.30 | 0.49-2.29 | 2.31-2.75      | 2.30-2.75 | 2.29-2.73 |            |                        |
| 500                       | 0.18-0.63      | 0.19-0.68 | 0.19-0.61 | 0.63-2.88         | 0.68-2.86 | 0.61-2.89 | 2.88-3.28      | 2.86-3.27 | 2.89-3.26 | 2.0        |                        |
| 700                       | 0.16-0.59      | 0.17-0.55 | 0.17-0.56 | 0.59-2.82         | 0.55-2.84 | 0.56-2.82 | 2.82-3.33      | 2.84-3.32 | 2.82-3.33 |            |                        |
| 900                       | 0.16-0.53      | 0.15-0.53 | 0.15-0.49 | 0.53-2.83         | 0.53-2.81 | 0.49-2.79 | 2.83-3.32      | 2.81-3.31 | 2.79-3.30 |            |                        |
| 1100                      | 0.16-0.49      | 0.15-0.48 | 0.14-0.47 | 0.49-2.81         | 0.48-2.80 | 0.47-2.80 | 2.81-3.32      | 2.80-3.30 | 2.80-3.32 |            |                        |
| 500                       | 0.17-0.64      | 0.20-0.63 | 0.19-0.62 | 0.64-1.87         | 0.63-1.86 | 0.62-1.87 | 1.87-2.19      | 1.86-2.19 | 1.87-2.16 | 1.0        | 40                     |
| 700                       | 0.16-0.55      | 0.17-0.56 | 0.18-0.52 | 0.55-1.80         | 0.56-1.83 | 0.52-1.83 | 1.80-2.31      | 1.83-2.31 | 1.83-2.31 |            |                        |
| 900                       | 0.15-0.50      | 0.15-0.49 | 0.16-0.50 | 0.50-1.76         | 0.49-1.80 | 0.50-1.79 | 1.76-2.32      | 1.80-2.32 | 1.79-2.31 |            |                        |
| 1100                      | 0.16-0.51      | 0.15-0.49 | 0.15-0.47 | 0.51-1.79         | 0.49-1.78 | 0.47-1.74 | 1.79-2.32      | 1.78-2.31 | 1.74-2.30 |            |                        |
| 500                       | 0.17-0.63      | 0.22-0.66 | 0.18-0.57 | 0.63-2.37         | 0.66-2.38 | 0.57-2.33 | 2.37-2.73      | 2.38-2.73 | 2.33-2.73 | 1.5        |                        |
| 700                       | 0.17-0.59      | 0.17-0.57 | 0.17-0.55 | 0.59-2.33         | 0.57-2.34 | 0.55-2.33 | 2.33-2.75      | 2.34-2.74 | 2.33-2.75 |            |                        |
| 900                       | 0.15-0.52      | 0.16-0.52 | 0.17-0.48 | 0.52-2.28         | 0.52-2.32 | 0.48-2.31 | 2.28-2.75      | 2.32-2.75 | 2.31-2.75 |            |                        |
| 1100                      | 0.14-0.49      | 0.15-0.51 | 0.14-0.47 | 0.49-2.31         | 0.51-2.32 | 0.47-2.28 | 2.31-2.75      | 2.32-2.72 | 2.28-2.74 |            |                        |
| 500                       | 0.17-0.64      | 0.22-0.65 | 0.19-0.61 | 0.64-2.87         | 0.65-2.88 | 0.61-2.87 | 2.87-3.28      | 2.88-3.28 | 2.87-3.26 | 2.0        |                        |
| 700                       | 0.16-0.60      | 0.15-0.61 | 0.17-0.56 | 0.60-2.82         | 0.61-2.82 | 0.56-2.83 | 2.82-3.33      | 2.82-3.30 | 2.83-3.32 |            |                        |
| 900                       | 0.15-0.53      | 0.17-0.51 | 0.15-0.49 | 0.53-2.82         | 0.51-2.83 | 0.49-2.80 | 2.86-3.32      | 2.83-3.32 | 2.80-3.26 |            |                        |
| 1100                      | 0.16-0.49      | 0.18-0.48 | 0.17-0.47 | 0.49-2.81         | 0.48-2.81 | 0.47-2.79 | 2.81-3.32      | 2.81-3.32 | 2.79-3.32 |            |                        |
